# Supplementary material for: Systematic comparison of tools used for m6A mapping from nanopore direct RNA sequencing
Source: PubMed Central journal article supplement (PMC10076423; doi:10.1038/s41467-023-37596-5), 2023-04-05
Supplement: 41467_2023_37596_MOESM1_ESM.pdf [file 41467_2023_37596_MOESM1_ESM.pdf]

# Supplementary information

## Systematic comparison of tools used for m6A mapping from nanopore direct RNA sequencing

Zhen-Dong Zhong<sup>1,4</sup>, Ying-Yuan Xie<sup>1,4</sup>, Hong-Xuan Chen<sup>1</sup>, Ye-Lin Lan<sup>1</sup>, Xue-Hong Liu<sup>1</sup>, Jing-Yun Ji<sup>1</sup>, Fu Wu<sup>1</sup>, Lingmei Jin<sup>2</sup>, Jiekai Chen<sup>2</sup>, Daniel W. Mak<sup>3</sup>, Zhang Zhang<sup>1,\*</sup> and Guan-Zheng Luo<sup>1,\*</sup>

1 MOE Key Laboratory of Gene Function and Regulation, Guangdong Province Key Laboratory of Pharmaceutical Functional Genes, State Key Laboratory of Biocontrol, School of Life Sciences, Sun Yat-sen University, Guangzhou 510275, China

2 CAS Key Laboratory of Regenerative Biology, Guangzhou Institutes of Biomedicine and Health, Chinese Academy of Sciences, Guangzhou, China.

3 School of Biomedical Sciences, LKS Faculty of Medicine, The University of Hong Kong, Hong Kong, China

4 These authors contributed equally

\*Correspondence:

luogzh5@mail.sysu.edu.cn (G.Z.L.) and zhangzhang@mail.sysu.edu.cn (Z.Z)

# SUPPLEMENTARY FIGURES

a

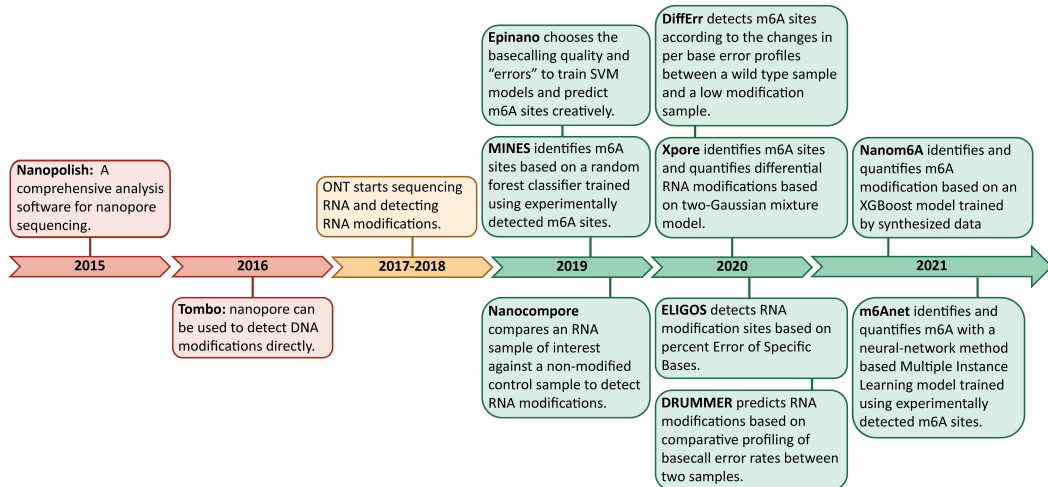

b

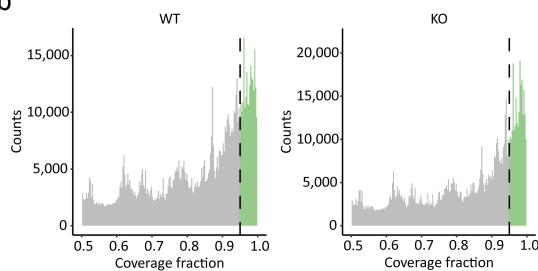

c

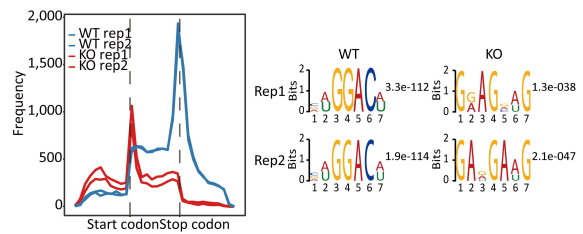

d

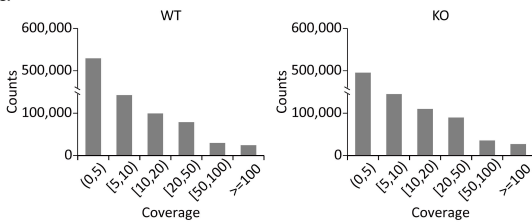

**Supplementary Fig. 1 Development of m6A detection using nanopore sequencing and datasets used for benchmarking. a** Timestamp of the advent of ONT tools for m6A detection. **b** Frequency of reads with different coverage fraction. Coverage fraction, fraction of annotated transcripts from GENCODE.VM18 covered by reads. Reads in the right side (green-shaded) of dotted line (coverage fraction=0.95) could be considered as full-length reads. **c** Metagene plots and motif preferences of m6A peaks from MeRIP-seq results. **d** Counts of sites in RRACH motifs with different coverage.

**a**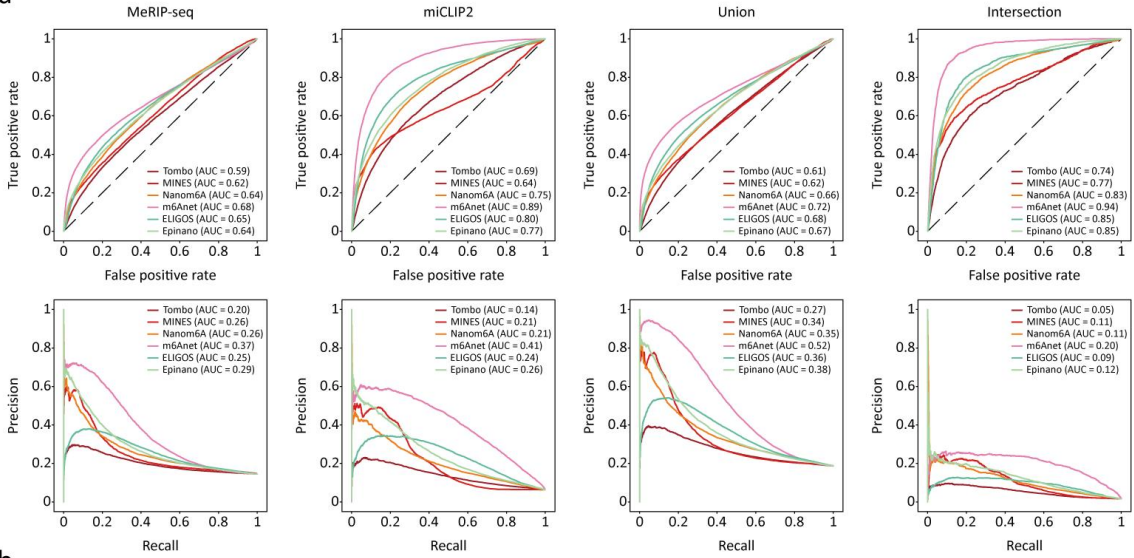**b**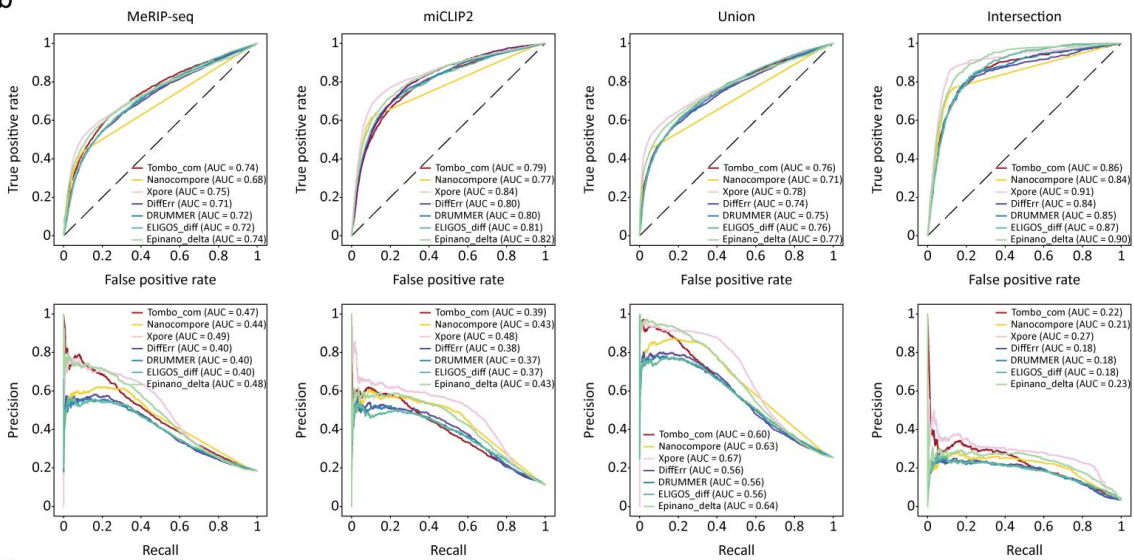**c**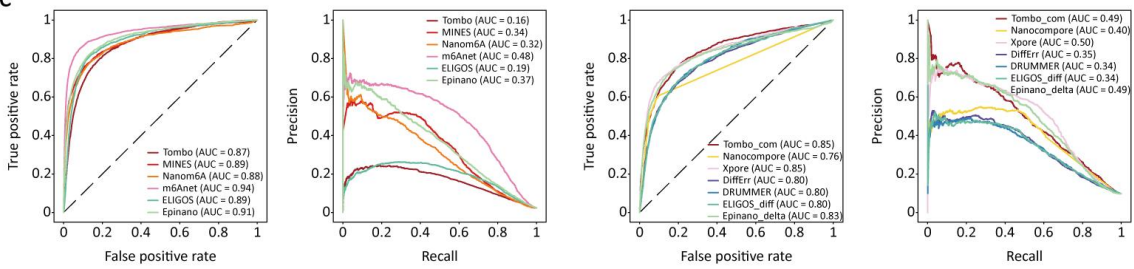

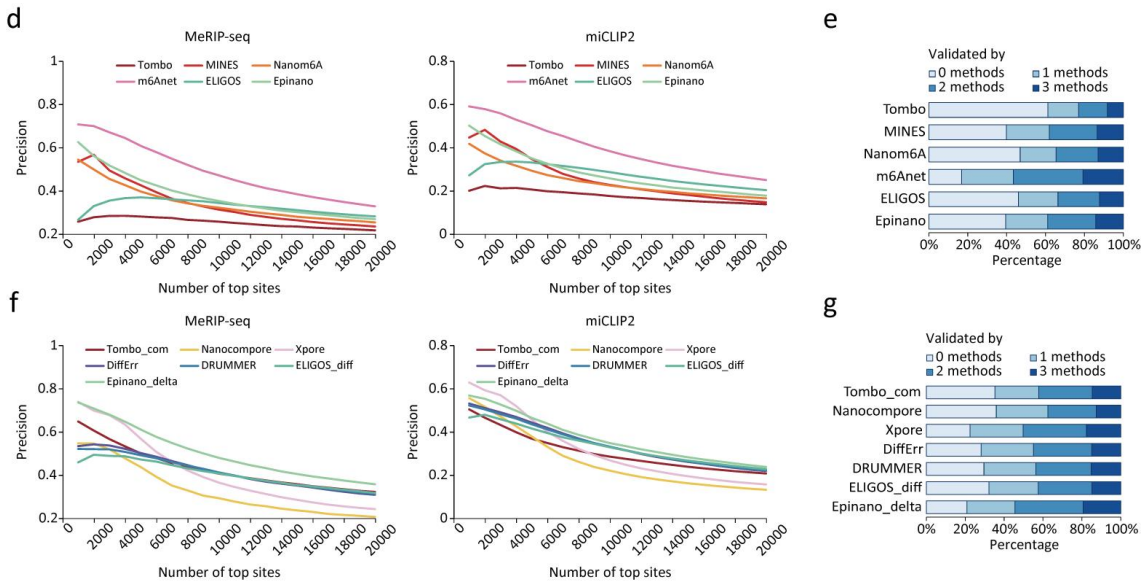

**Supplementary Fig. 2 Performance for the ten ONT tools evaluated for m6A detection capability in mouse. a-b** Receiver Operating Characteristic (ROC) curve (top) and Precision Recall (PR) curve (bottom) for candidate sites detected by single-mode tools (**a**) and compare-mode tools (**b**) using different data as ground truth. Area under the curve (AUC) indicated in parentheses. **c** ROC curve and PR curve for candidate sites detected by tools using MeRIP-seq data as ground truth, but sites with maximum of the predicted probability within each peak are selected to represent the results. Precision for top 20,000 m6A sites detected by single-mode tools (**d**) and compare tools (**f**) using the MeRIP-seq and miCLIP2 data as ground truth. Percentage for top 5,000 m6A sites detected by single-mode tools (**e**) and compare-mode tools (**g**) validated by different number of NGS-based methods.

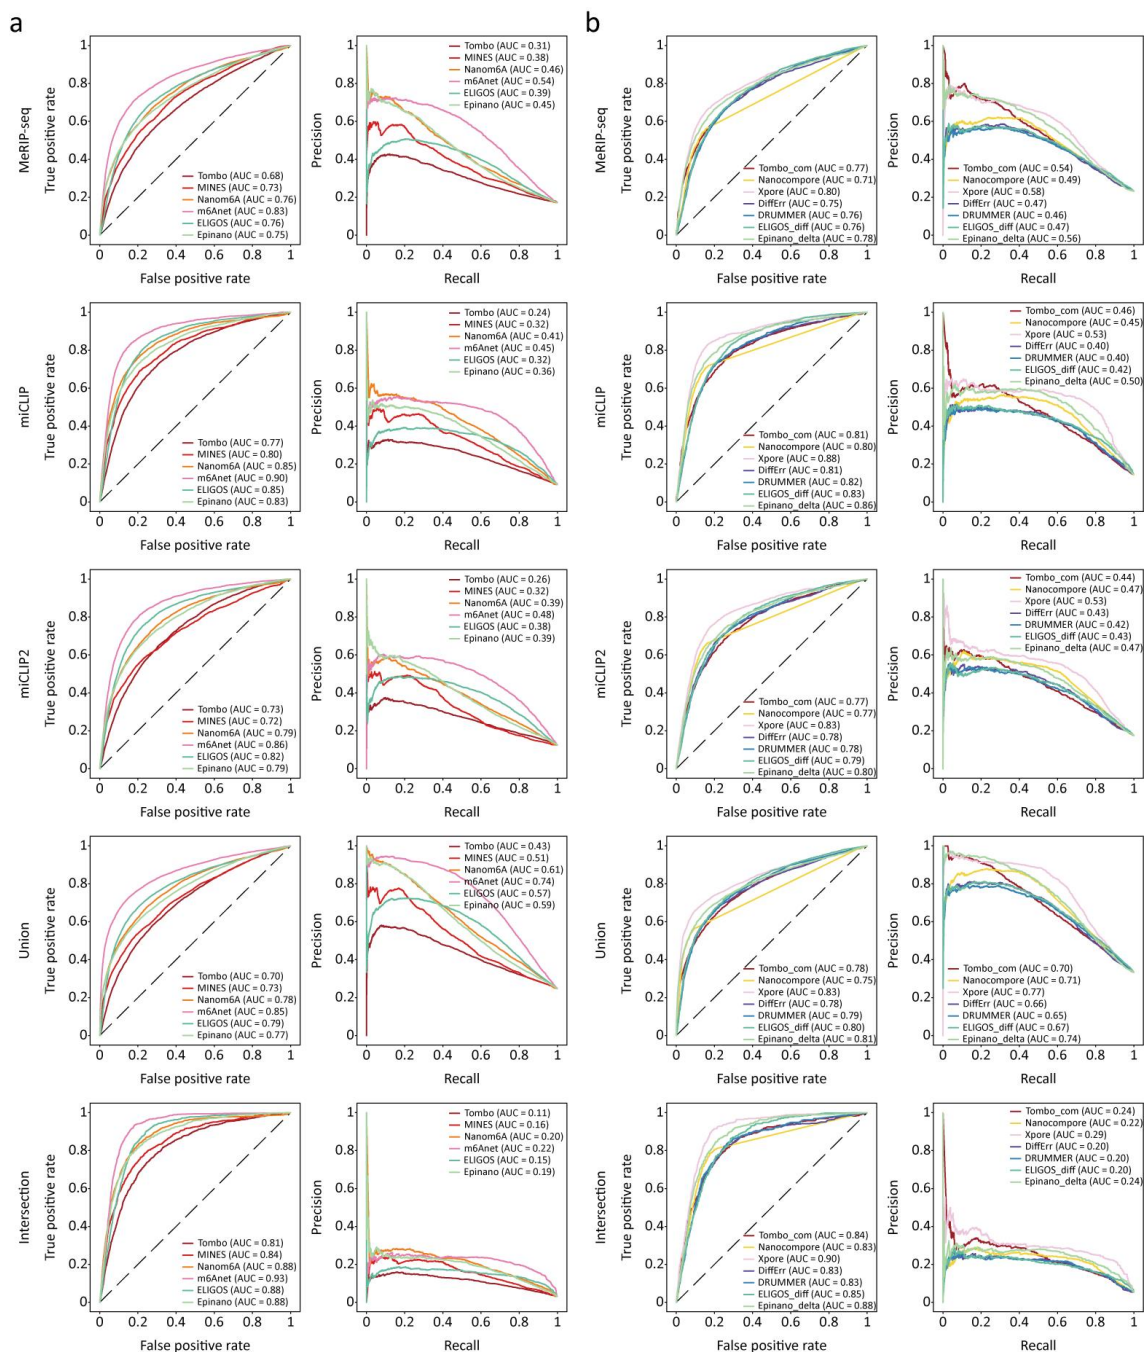

**Supplementary Fig. 3 Continuous evaluation metrics for the ten ONT tools for m6A detection of sites in AGACT/GGACH motifs in mouse. a-b ROC curve (left) and PR curve (right) for candidate sites in AGACT/GGACH motifs detected by single-mode tools (a) and compare-mode tools (b) using different data as ground truth. AUC indicated in parentheses.**

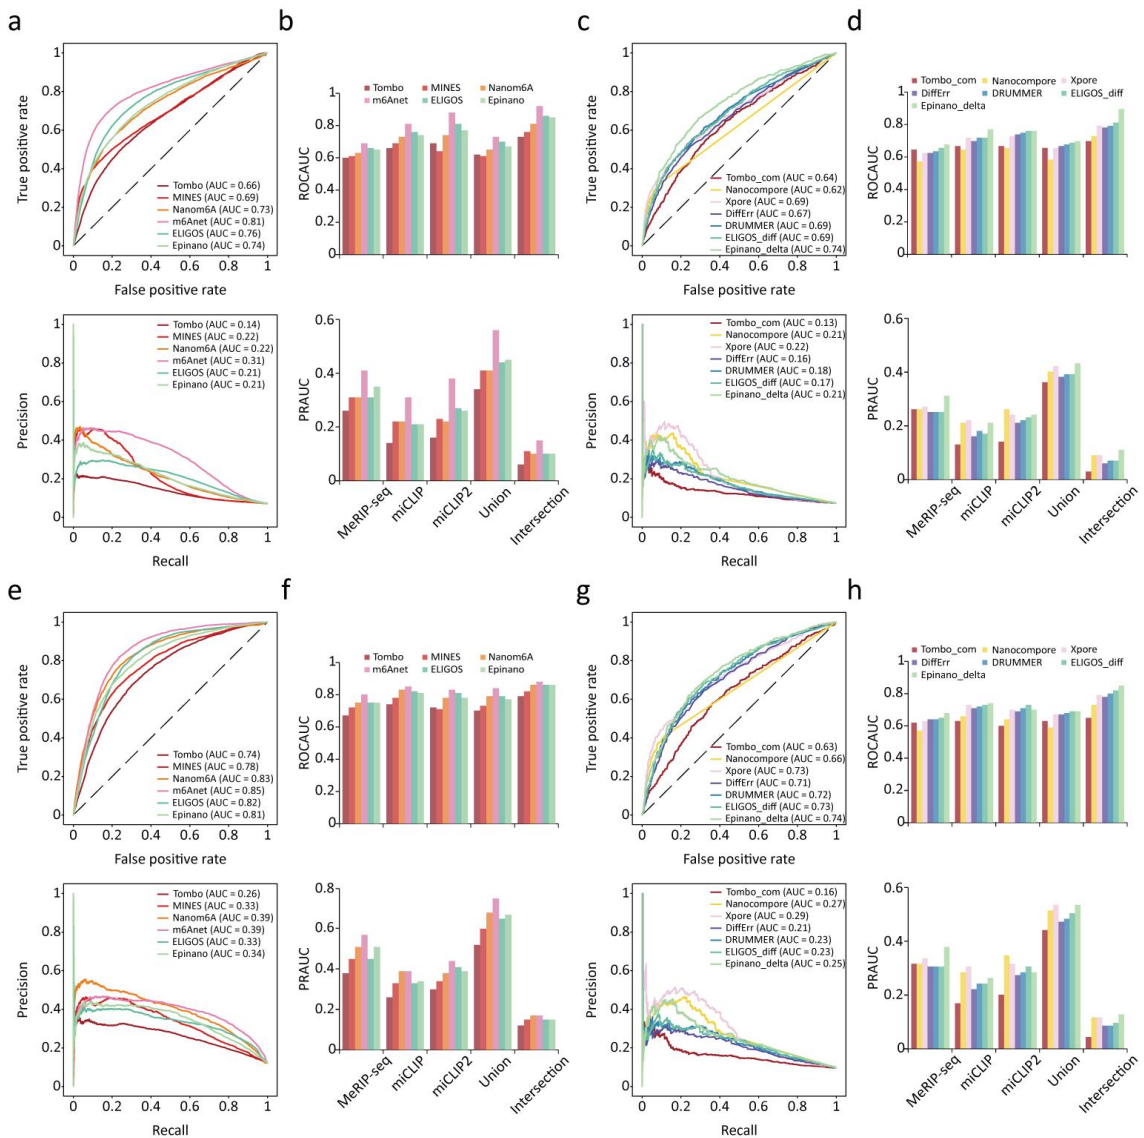

**Supplementary Fig. 4 Continuous evaluation metrics for the ten ONT tools for m6A detection of sites in mouse (replicate).** ROC curve (top) and PR curve (bottom) for candidate sites detected by single-mode tools (a) and compare-mode tools (c) using the miCLIP data as ground truth. AUC indicated in parentheses. ROC AUC (top) and PR AUC (bottom) for candidate sites detected by single-mode tools (b) and compare tools (d) using different data as ground truth. ROC curve (top) and PR curve (bottom) for candidate sites in AGACT/GGACH motifs detected by single-mode tools (e) and compare-mode tools (g) using the miCLIP data as ground truth. AUC indicated in parentheses. ROC AUC (top) and PR AUC (bottom) for candidate sites in AGACT/GGACH motifs detected by single-mode tools (f) and compare tools (h) using different data as ground truth.

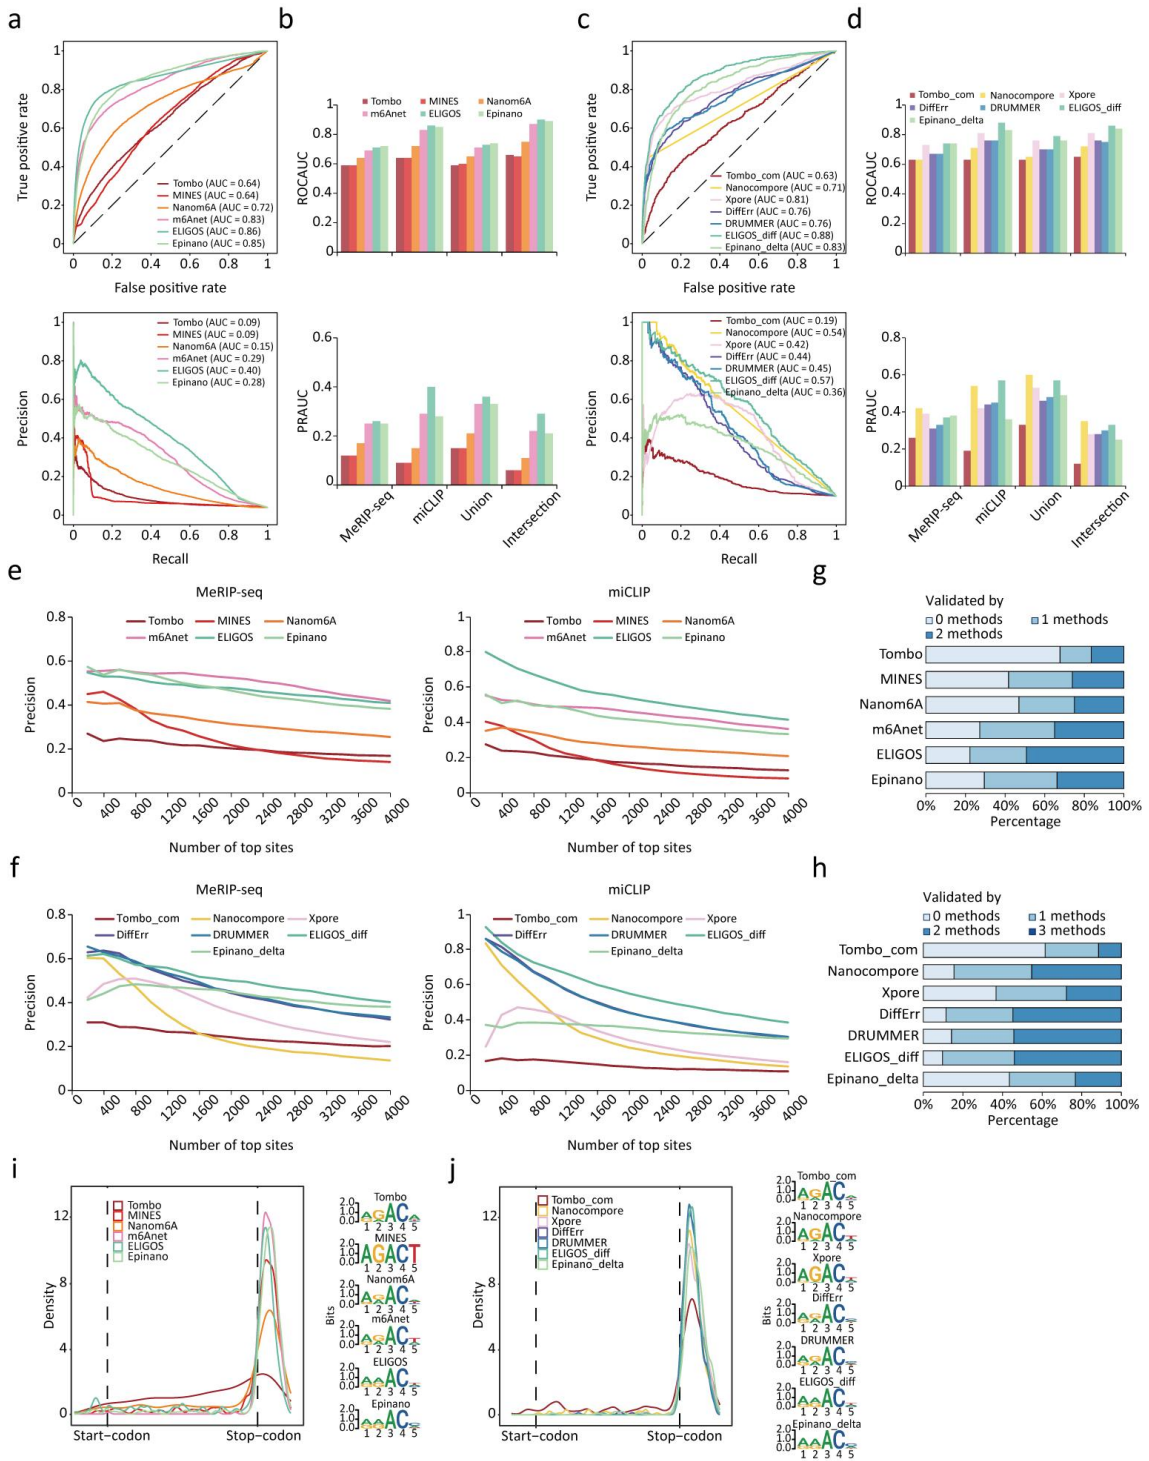

**Supplementary Fig. 5 Performance for the ten ONT tools evaluated for m6A detection capability in Arabidopsis.** ROC curve (top) and PR curve (bottom) for candidate sites detected by single-mode tools (**a**) and compare-mode tools (**c**) using the miCLIP data as ground truth. AUC indicated in parentheses. ROC AUC (top) and PR AUC (bottom) for candidate sites detected by single-mode tools (**b**) and compare tools (**d**) using different data as ground truth. **e-f** Precision for top 4,000 m6A sites detected by single-mode tools (**e**) and compare tools (**f**) using the MeRIP-seq and miCLIP data as ground truth. **g-h** Percentage for top 400 m6A sites detected by single-mode tools (**g**) and compare-mode tools (**h**) validated by different number of NGS-based methods. **i-j** Metagene plots (left) of the transcriptome-wide m6A distribution for top 400 m6A sites detected by single-mode tools (**i**) and compare-mode tools (**j**). Seqlogo plots (right) show the frequency of the RRACH motif for top 400 m6A sites detected by single-mode tools (**i**) and compare-mode tools (**j**).



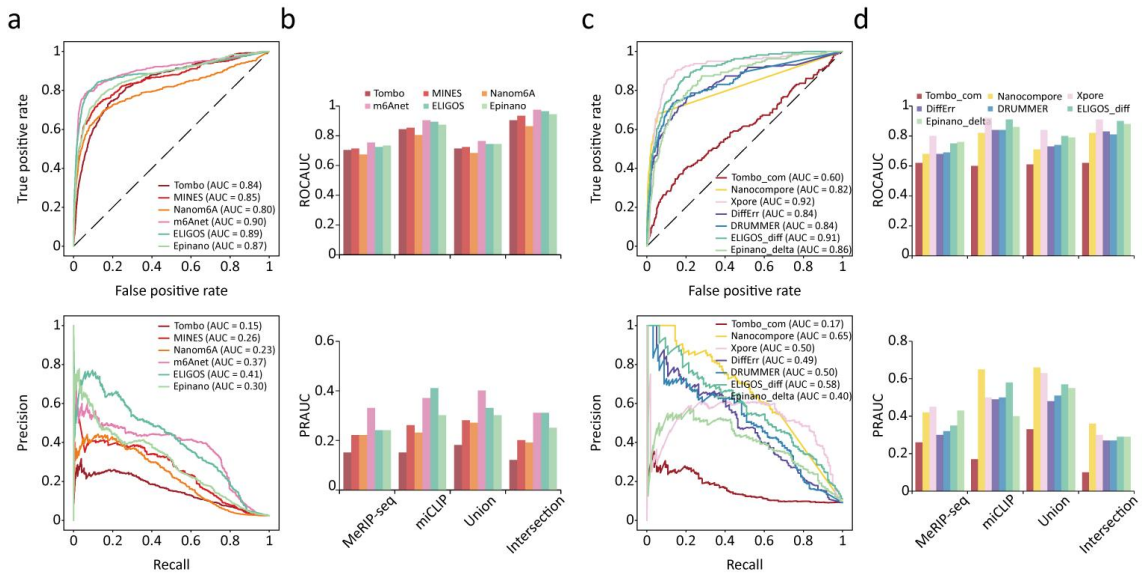

**Supplementary Fig. 6 Continuous evaluation metrics for the ten ONT tools for m6A detection of sites in AGACT/GGACH motifs in *Arabidopsis*.** ROC curve (top) and PR curve (bottom) for candidate sites in AGACT/GGACH motifs detected by single-mode tools (a) and compare-mode tools (c) using the miCLIP data as ground truth. AUC indicated in parentheses. ROCAUC (top) and PRAUC (bottom) for candidate sites in AGACT/GGACH motifs detected by single-mode tools (b) and compare tools (d) using different data as ground truth.

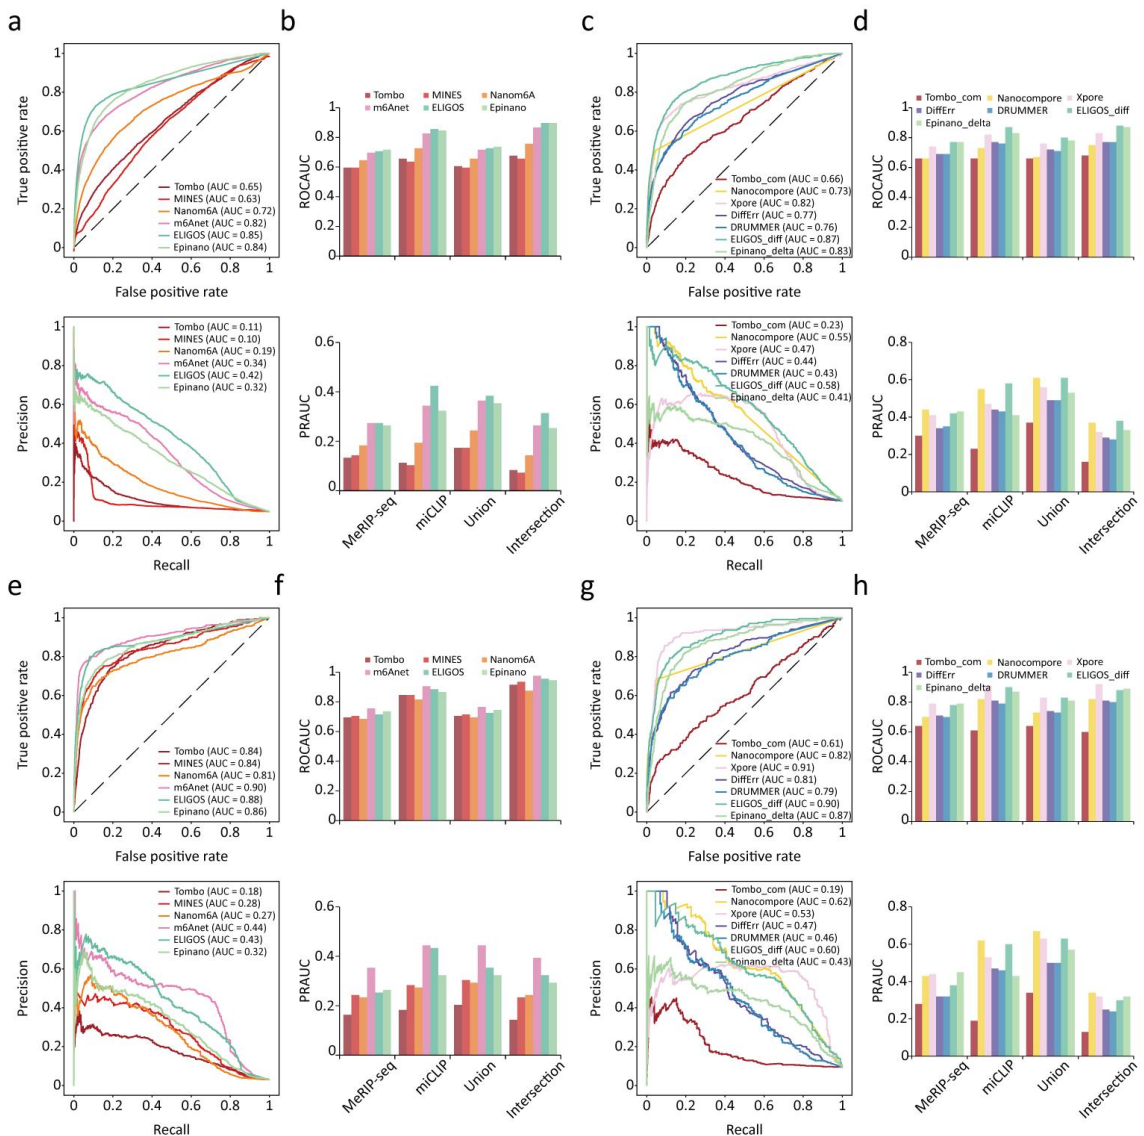

**Supplementary Fig. 7 Continuous evaluation metrics for the ten ONT tools for m6A detection of sites in Arabidopsis (replicate).** ROC curve (top) and PR curve (bottom) for candidate sites detected by single-mode tools (a) and compare-mode tools (c) using the miCLIP data as ground truth. AUC indicated in parentheses. ROC AUC (top) and PR AUC (bottom) for candidate sites detected by single-mode tools (b) and compare tools (d) using different data as ground truth. ROC curve (top) and PR curve (bottom) for candidate sites in AGACT/GGACH motifs detected by single-mode tools (e) and compare-mode tools (g) using the miCLIP data as ground truth. AUC indicated in parentheses. ROC AUC (top) and PR AUC (bottom) for candidate sites in AGACT/GGACH motifs detected by single-mode tools (f) and compare tools (h) using different data as ground truth.

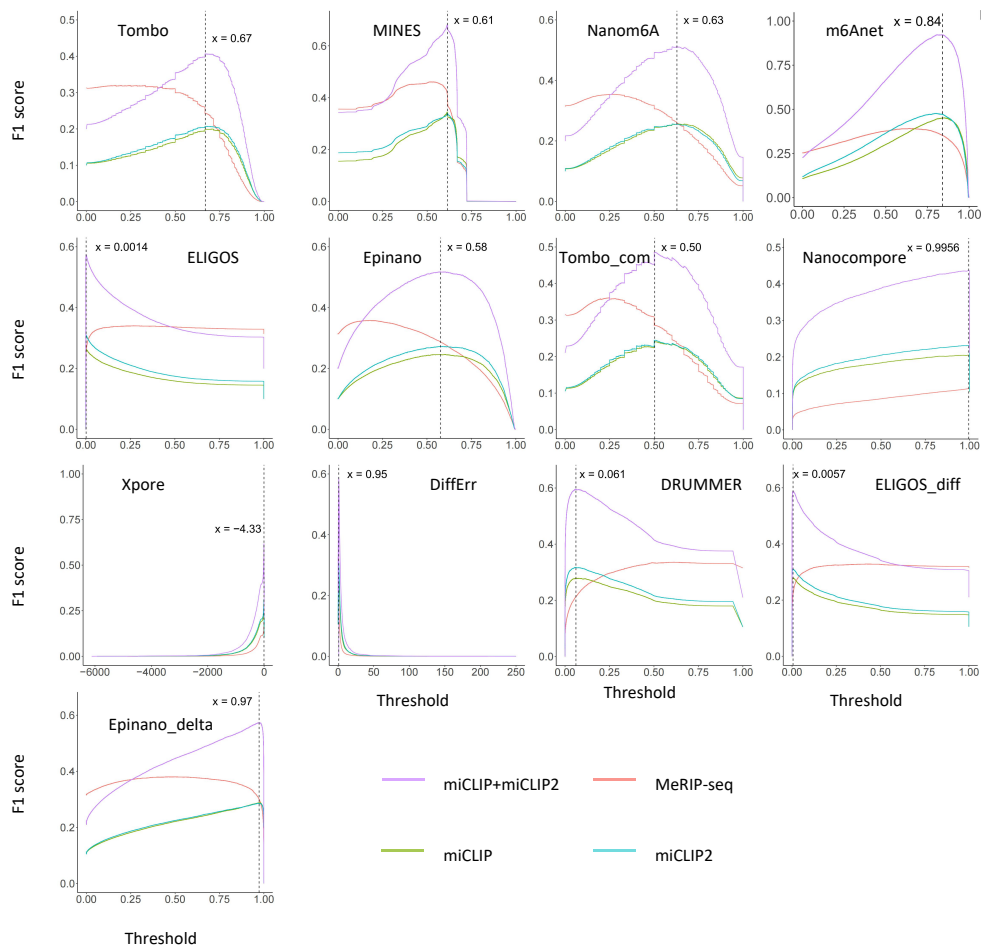

**Supplementary Fig. 8 Selection of the best cut-offs for ONT tools.** Plots show the distribution of F1 scores with varying cut-offs of all tools using MeRIP-seq, miCLIP and miCLIP2 results as validation sets. “miCLIP and miCLIP2” represents the sum of F1 scores from miCLIP and miCLIP2.

a

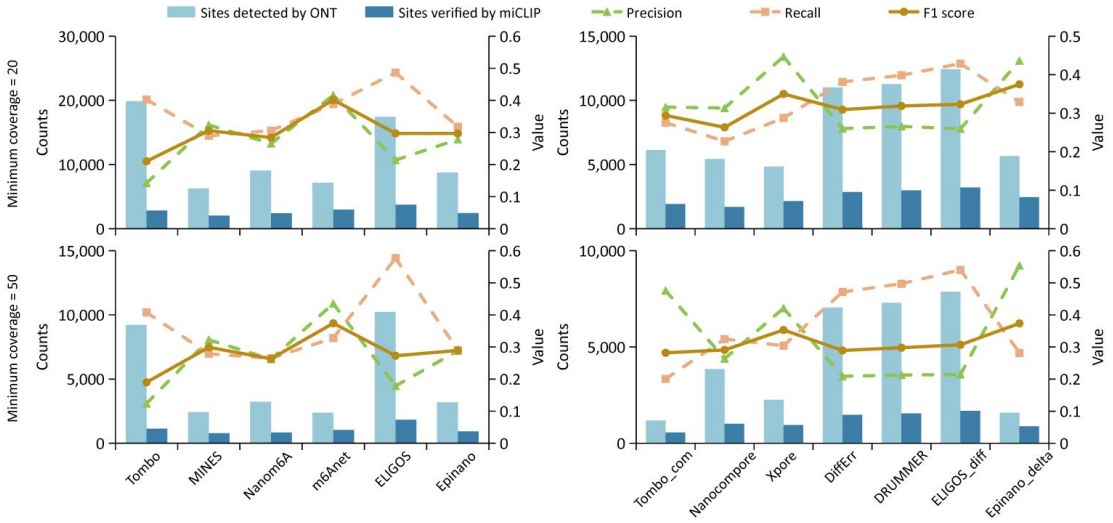

b

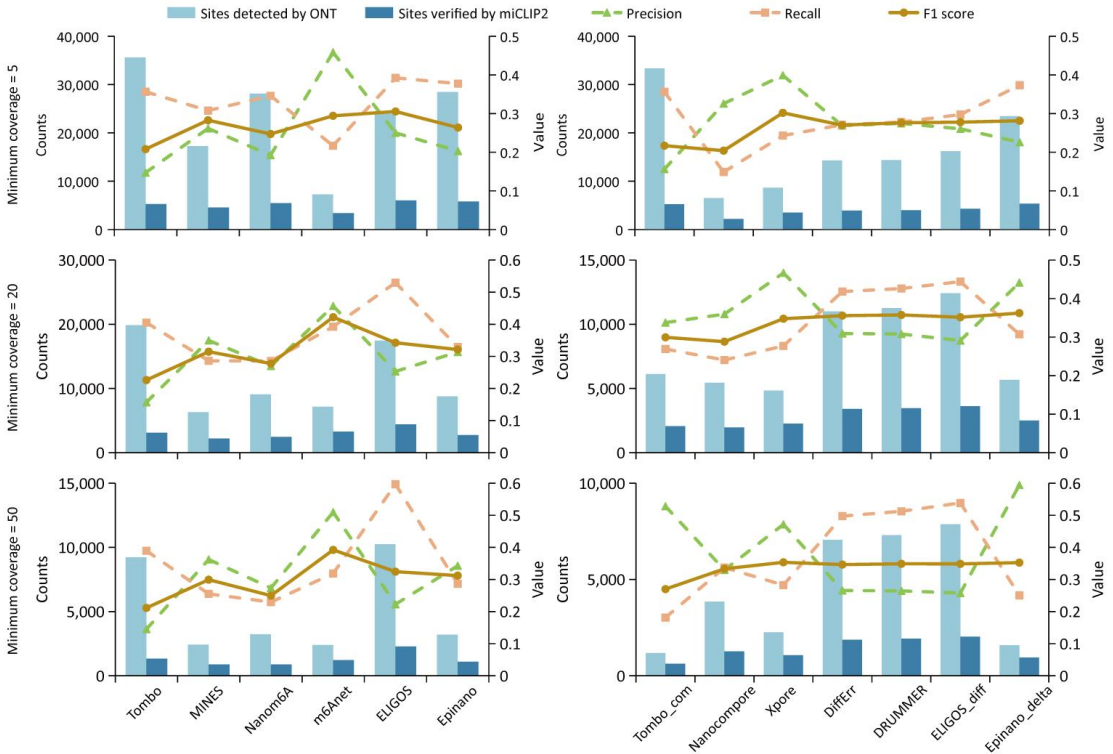

**Supplementary Fig. 9 Performance of m6A detection for ONT tools under the optimal cut-off. a-b** Precision, recall and F1 scores for ONT tools using miCLIP results (a) and miCLIP2 results (b) as validation set. Minimum coverage requirements of sites indicated in the left side.

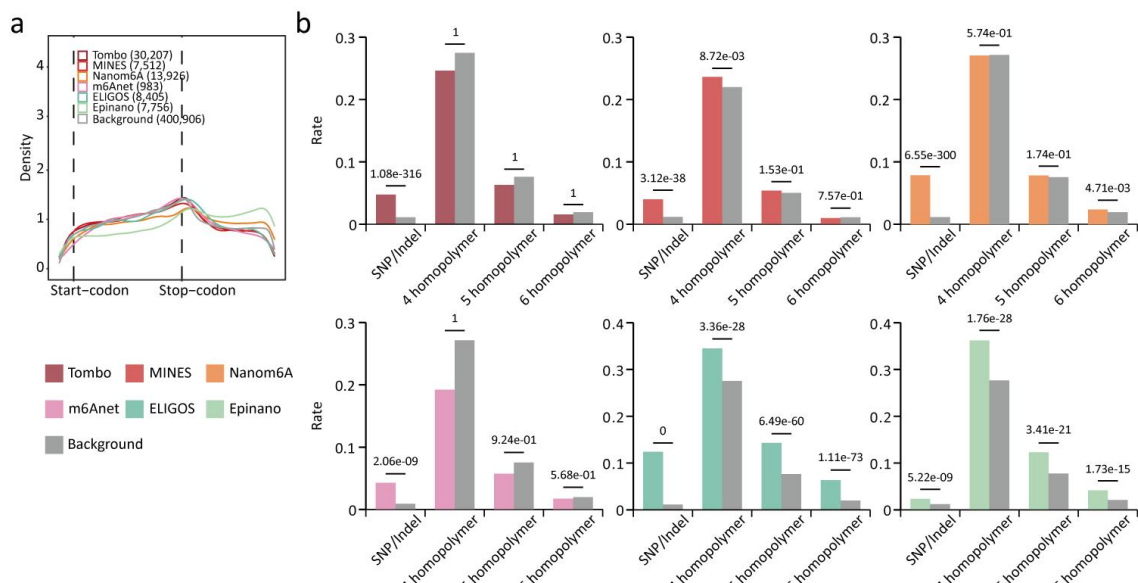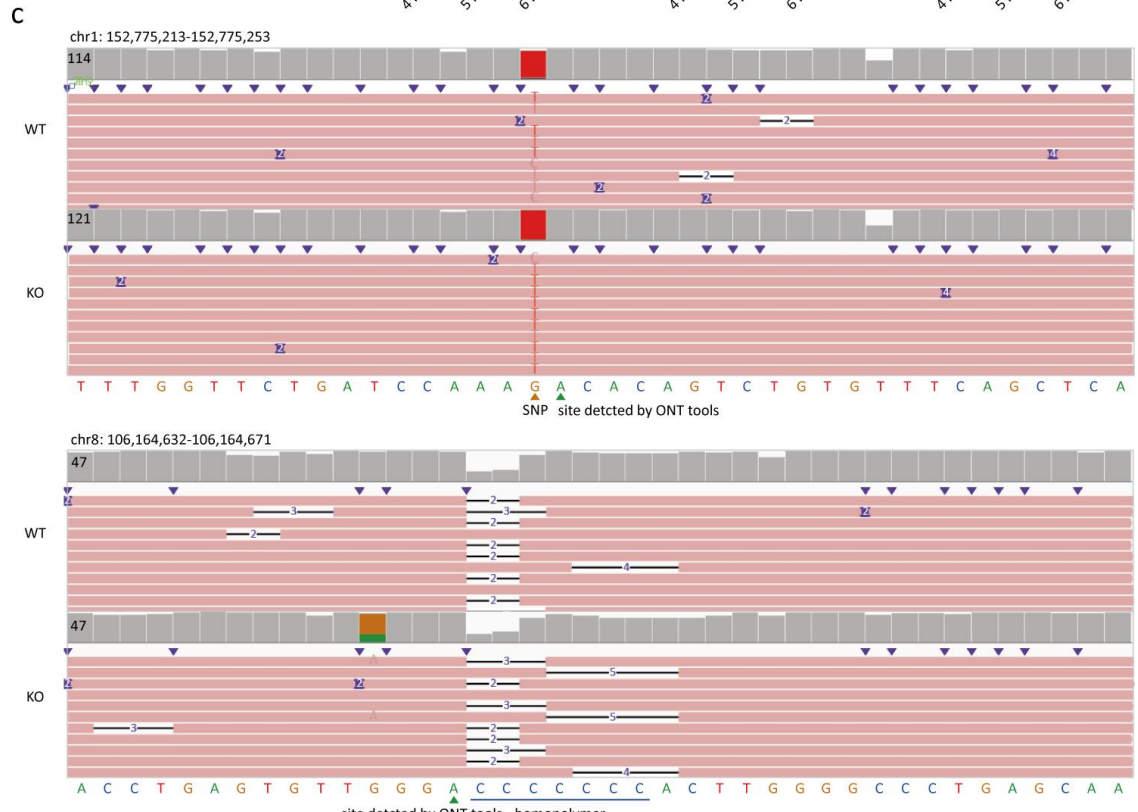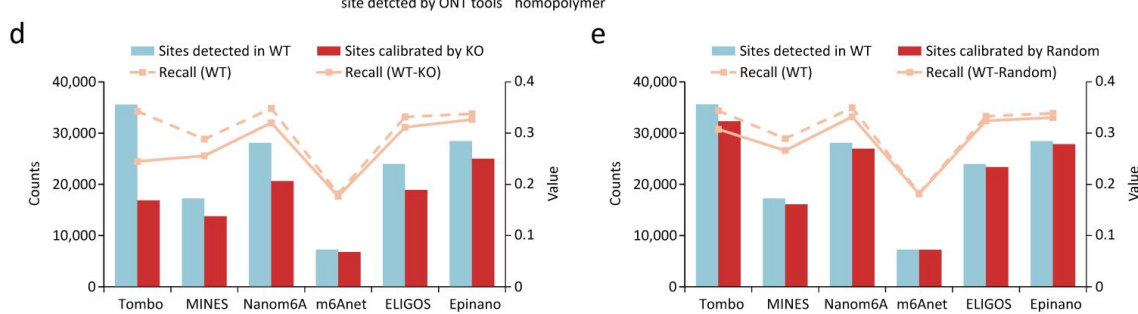

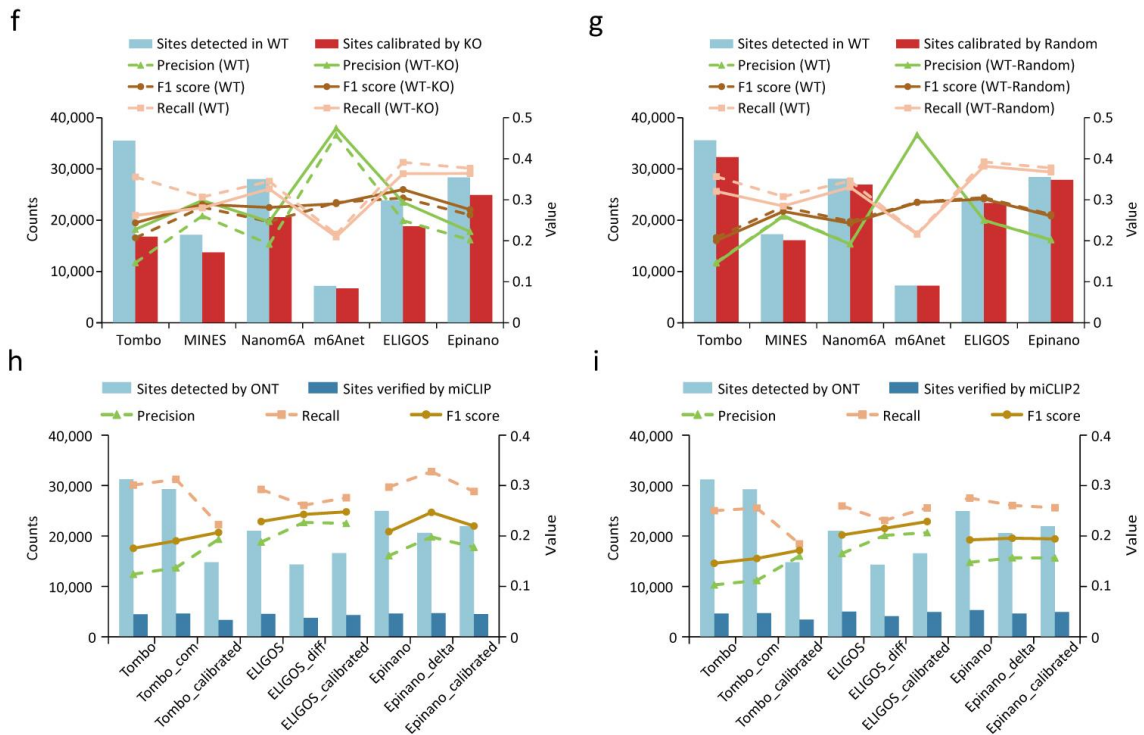

**Supplementary Fig. 10 Assessment of intrinsic bias and the effects of using a negative control on m6A detection.** **a** Metagene plots of m6A sites detected in KO samples under the best cut-off. “Background” means all RRACH sites with coverage  $\geq 5$  nanopore reads in KO samples. Number of sites indicated in parentheses. **b** Rates of different types intrinsic bias in the sites detected both in WT and KO samples. “Background” means all RRACH sites with coverage  $\geq 5$  nanopore reads. One-side Binomial tests were applied to calculate significance. **c** IGV snapshots of two highly probable false positives around SNP/homopolymer in WT and KO samples. Coverage for each site is indicated on the left of each short sequence. **d-e** Comparison of recall before and after calibration with the KO sample results (**d**) and a random dataset (**e**). WT shows the recall for m6A sites detected in the WT samples, WT-KO shows the recall for sites calibrated using KO results, and WT-random shows the recall for sites calibrated with a randomly selected dataset. miCLIP results were used as a validation set. **f-g** Comparison of precision, recall and F1 score before and after calibration with the KO sample results (**f**) and a random dataset (**g**). miCLIP2 results were used as a validation set. **h-i** Comparison of number of m6A sites, precision, recall and F1 scores using original mode, compare mode and calibration with the KO sample results for Tombo, ELIGOS and Epimano. The validation set is derived from the miCLIP results in **h**, the miCLIP2 results in **i**.

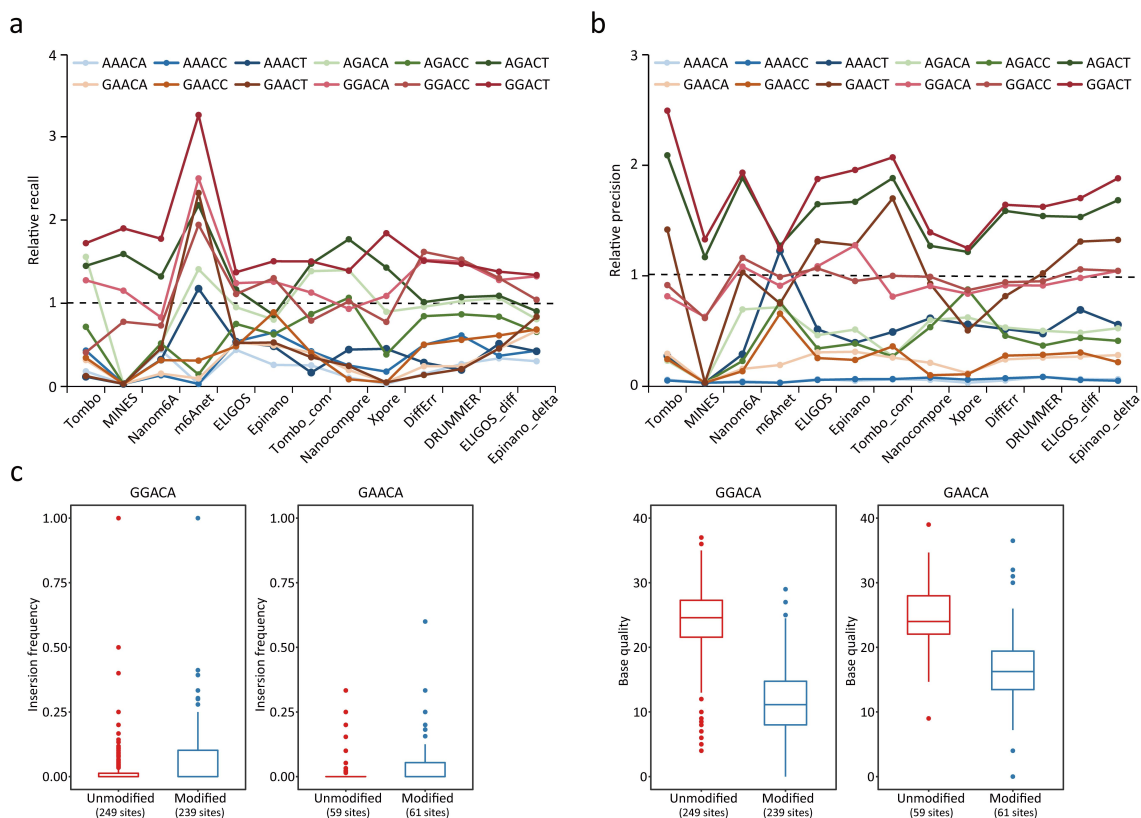

**Supplementary Fig. 11 Detection capacity for m6A among sequence motifs. a-b** Relative recall rates (**a**) and precision (**b**) for all tools for 12 motifs bearing the consensus sequence RRACH. Relative recall rates/precision were calculated as the ratio of the recall/precision for the sites in a specific motif to the overall mean (across all sites). A m6A profile created from miCLIP2 results was used for validation. **c** A comparison of insertion frequency and base quality for modified and unmodified sites in GGACA and GAACA motifs. In the Boxplot, the upper and lower limits represent the 75th and 25th percentiles, respectively, while the center line represents the median; upper and lower whiskers indicate  $\pm 1.5 \times$  the interquartile range (IQR). The number of sites is indicated in parentheses.

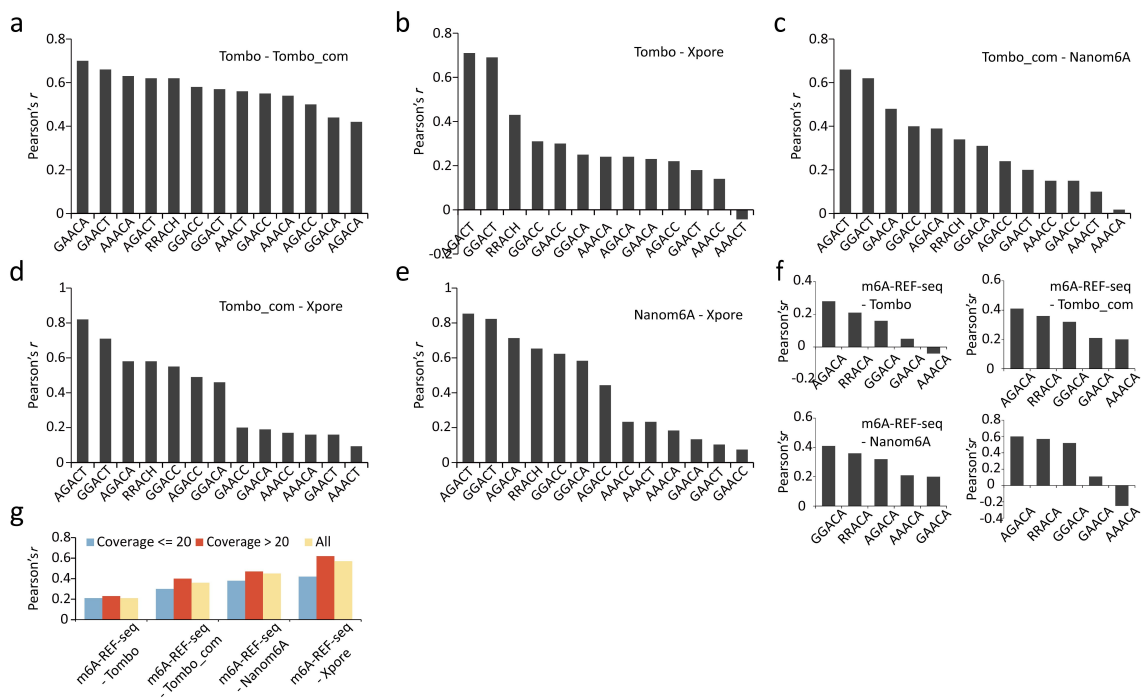

**Supplementary Fig. 12 Performance of m6A quantification in different motifs and coverage.** **a-f** Correlation coefficients for methylation rates observed between each paired comparison for m6A sites in different motifs. **g** Correlation coefficients for methylation rates observed between each tool and m6A-REF-seq for m6A sites with different sequencing coverage.



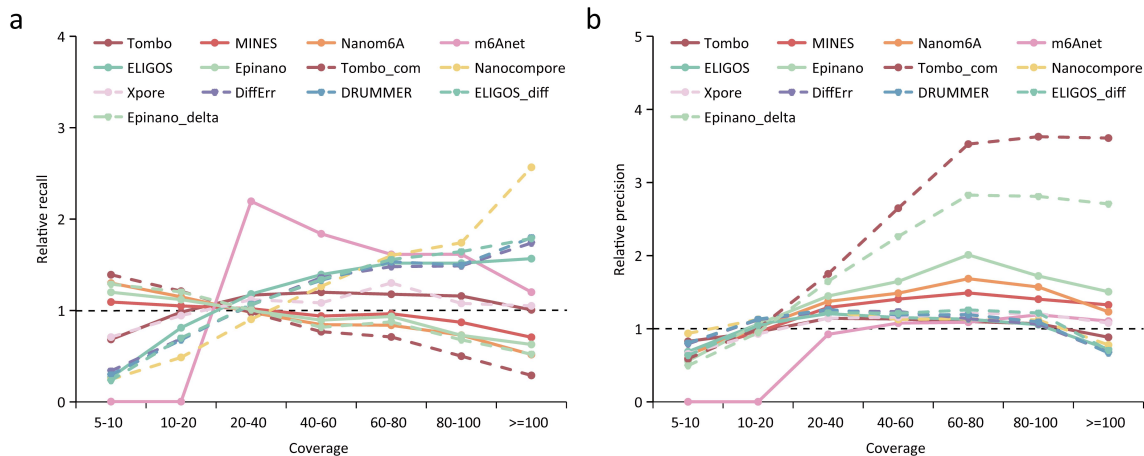

**Supplementary Fig. 13 Detection sensitivity for m6A sites varying in coverage. a-b** Relative recall rates (**a**) and precision (**b**) for m6A sites versus coverage. Relative recall rates/precision were calculated as the ratio of the recall rate/precision for m6A sites with a given coverage to the overall mean (across all sites). The validation set used came from the miCLIP2 results.

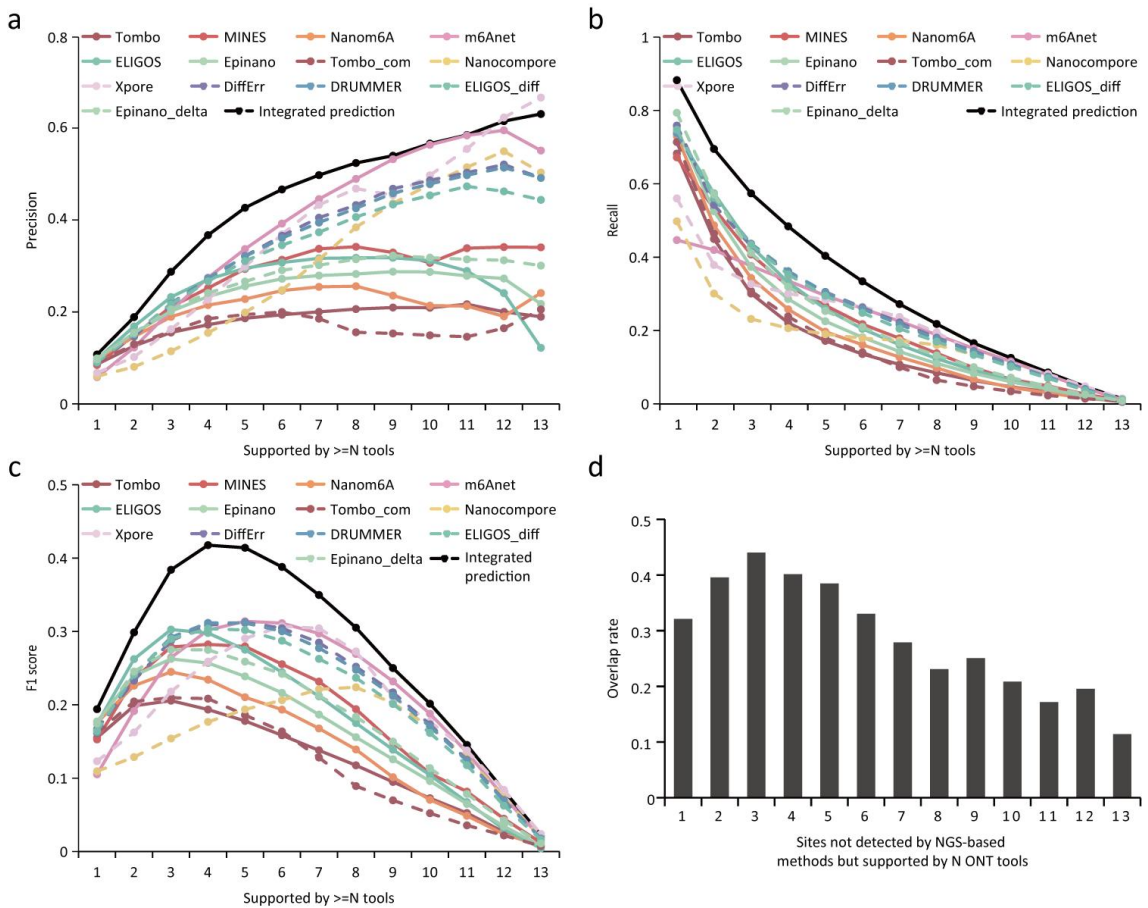

**Supplementary Fig. 14 Performance of m6A detection by integrating results from all tools. a-c** Precision (a), recall (b) and F1 scores (c) of m6A sites for integrated predictions and each individual tool versus the number of supported tools. For each category, the number of top m6A sites is identical to integrated predictions. The validation sets used came from the miCLIP2 results. **d** Overlap ratio between m6A sites not detected by NGS-based methods but supported by different number of ONT tools and m6A sites detected in mESCs KO samples.

**SUPPLEMENTARY TABLES**

|                    | <b>Published time</b> | <b>Classification strategy</b> | <b>Classification method</b> | <b>Specific algorithms</b>                      | <b>Model source</b>               | <b>Control sample required</b> | <b>Reference</b>     | <b>Motif</b> |
|--------------------|-----------------------|--------------------------------|------------------------------|-------------------------------------------------|-----------------------------------|--------------------------------|----------------------|--------------|
| <b>Tombo</b>       | 2016.12.15            | current                        | statistical test             | Fisher's test                                   | integral k-mers from nanopore     | alternative                    | transcriptome        | NNNNN        |
| <b>Epinano</b>     | 2019.09.09            | base-calling "errors"          | machine learning             | Support Vector Machine(SVM)                     | "curlcakes"                       | alternative                    | transcriptome/genome | RRACH        |
| <b>MINES</b>       | 2019.10.17            | current                        | machine learning             | Random Forest(RF)                               | miCLIP data from HEK293T cells    | no                             | transcriptome        | AGACT, GGACH |
| <b>Nanocompore</b> | 2019.11.15            | current                        | clustering                   | Gaussian mixture model(GMM)                     | \                                 | yes                            | transcriptome        | NNNNN        |
| <b>DiffErr</b>     | 2020.01.14            | base-calling "errors"          | statistical test             | G-test                                          | \                                 | yes                            | transcriptome/genome | NNNNN        |
| <b>Xpore</b>       | 2020.06.20            | current                        | clustering                   | Gaussian mixture model(GMM)                     | \                                 | no                             | transcriptome        | NNNNN        |
| <b>ELIGOS</b>      | 2020.07.25            | base-calling "errors"          | statistical test             | Fisher's exact test                             | In vitro transcription            | alternative                    | transcriptome/genome | NNANN        |
| <b>DRUMMER</b>     | 2020.11.26            | base-calling "errors"          | statistical test             | G-test                                          | \                                 | yes                            | transcriptome/genome | NNANN        |
| <b>Nanom6A</b>     | 2021.01.07            | current                        | machine learning             | XGBoost                                         | "curlcakes"                       | no                             | genome               | RRACH        |
| <b>m6Anet</b>      | 2021.09.22            | current                        | machine learning             | Multiple Instance Learning based Neural Network | miCLIP data from HCT116 cell line | no                             | transcriptome        | DRACH        |

**Supplementary Table 1** Detailed information of all ONT tools. "curlcakes" are sequences that they include all possible 5-mers by in-vitro synthesized.

**Supplementary Table 2** Reads quality and alignment statistics for all samples.

|                                |                          | <b>Basecalled reads</b> | <b>Mean read length</b> | <b>Mean read quality</b> | <b>Aligned reads</b> |
|--------------------------------|--------------------------|-------------------------|-------------------------|--------------------------|----------------------|
| <b>mESCs</b>                   | <b>wide type</b>         | 1,309,027               | 1,058.5                 | 10.2                     | 1,282,198            |
|                                | <i>Mettl3</i> knockout   | 1,316,561               | 1,072.2                 | 10.8                     | 1,289,348            |
| <b>mESCs (replicate)</b>       | <b>wide type</b>         | 3,079,421               | 528.0                   | 9.9                      | 2,979,700            |
|                                | <i>Mettl3</i> knockout   | 1,486,950               | 438.4                   | 10.0                     | 1,431,246            |
| <b>Arabidopsis</b>             | <b>wide type</b>         | 1,059,560               | 1,034.1                 | 10.6                     | 972,804              |
|                                | mutants defective in m6A | 1,093,477               | 1,061.9                 | 10.3                     | 966,780              |
| <b>Arabidopsis (replicate)</b> | <b>wide type</b>         | 790,015                 | 989.9                   | 10.6                     | 741,436              |
|                                | mutants defective in m6A | 1,843,192               | 1,058.8                 | 10.6                     | 1,680,748            |

**Supplementary Table 3** Final datasets used for evaluating ONT tools of all samples.

|                                              | mESCs         |               | mESCs (replicate) |              | Arabidopsis  |               | Arabidopsis (replicate) |              |
|----------------------------------------------|---------------|---------------|-------------------|--------------|--------------|---------------|-------------------------|--------------|
|                                              | single-mode   | compare-mode  | single-mode       | compare-mode | single-mode  | compare-mode  | single-mode             | compare-mode |
| <b>Evaluated sites (coverage)</b>            | 105,241 (147) | 124,676 (127) | 73,509 (261)      | 73,816 (261) | 86,531 (121) | 104,552 (104) | 63,736 (114)            | 77,995 (97)  |
| <b>Validated sites by miCLIP (coverage)</b>  | 6,026 (83)    | 7,414 (72)    | 5,200 (187)       | 5,255 (183)  | 3,422 (620)  | 3,842 (555)   | 3,102 (523)             | 3,596 (455)  |
| <b>Validated sites by miCLIP2 (coverage)</b> | 6,652 (121)   | 8,060 (104)   | 5,611 (252)       | 5,692 (251)  | -            | -             | -                       | -            |

**Supplementary Table 4** Counts of validated sites in different motifs of all samples.

**Validated sites by miCLIP**

| Motif        | mESCs       |              | mESCs (replicate) |              | Arabidopsis |              | Arabidopsis (replicate) |              |
|--------------|-------------|--------------|-------------------|--------------|-------------|--------------|-------------------------|--------------|
|              | single-mode | compare-mode | single-mode       | compare-mode | single-mode | compare-mode | single-mode             | compare-mode |
| <b>AAACA</b> | 278         | 328          | 216               | 200          | 659         | 747          | 599                     | 689          |
| <b>AAACC</b> | 157         | 186          | 120               | 119          | 356         | 400          | 325                     | 377          |
| <b>AAACT</b> | 440         | 524          | 365               | 363          | 775         | 865          | 689                     | 793          |
| <b>AGACA</b> | 417         | 520          | 329               | 341          | 267         | 297          | 243                     | 282          |
| <b>AGACC</b> | 219         | 272          | 165               | 170          | 83          | 99           | 76                      | 94           |
| <b>AGACT</b> | 807         | 972          | 724               | 735          | 273         | 308          | 250                     | 293          |
| <b>GAACA</b> | 342         | 402          | 264               | 261          | 265         | 303          | 240                     | 285          |
| <b>GAACC</b> | 167         | 199          | 140               | 136          | 204         | 220          | 186                     | 209          |
| <b>GAACT</b> | 830         | 971          | 720               | 726          | 327         | 360          | 298                     | 344          |
| <b>GGACA</b> | 818         | 1,079        | 700               | 728          | 79          | 94           | 73                      | 89           |
| <b>GGACC</b> | 393         | 509          | 343               | 344          | 63          | 71           | 58                      | 69           |
| <b>GGACT</b> | 1,158       | 1,452        | 1,114             | 1,132        | 71          | 78           | 65                      | 72           |

**Validated sites by miCLIP2**

| Motif        | mESCs       |              | mESCs (replicate) |              |
|--------------|-------------|--------------|-------------------|--------------|
|              | single-mode | compare-mode | single-mode       | compare-mode |
| <b>AAACA</b> | 39          | 47           | 35                | 34           |
| <b>AAACC</b> | 11          | 13           | 9                 | 9            |
| <b>AAACT</b> | 479         | 550          | 364               | 358          |
| <b>AGACA</b> | 191         | 233          | 156               | 165          |
| <b>AGACC</b> | 114         | 133          | 94                | 103          |
| <b>AGACT</b> | 1,091       | 1,306        | 938               | 950          |
| <b>GAACA</b> | 211         | 254          | 177               | 170          |
| <b>GAACC</b> | 99          | 114          | 89                | 88           |
| <b>GAACT</b> | 1,169       | 1,361        | 1,003             | 1,005        |
| <b>GGACA</b> | 822         | 1,069        | 688               | 732          |
| <b>GGACC</b> | 554         | 702          | 461               | 474          |
| <b>GGACT</b> | 1,872       | 2,278        | 1,597             | 1,604        |

**Supplementary Table 5** The Best F1 score for each tool and the corresponding threshold using miCLIP and miCLIP2 results as validation sets. “Sum” represents the sum of F1 scores from miCLIP and miCLIP2.

|                      | Threshold | F1 score using different validation sets |         | Sum  |
|----------------------|-----------|------------------------------------------|---------|------|
|                      |           | miCLIP                                   | miCLIP2 |      |
| <b>Tombo</b>         | 0.67      | 0.20                                     | 0.21    | 0.41 |
| <b>MINES</b>         | 0.61      | 0.34                                     | 0.34    | 0.68 |
| <b>Nanom6A</b>       | 0.63      | 0.26                                     | 0.26    | 0.51 |
| <b>m6Anet</b>        | 0.84      | 0.45                                     | 0.47    | 0.92 |
| <b>ELIGOS</b>        | 0.0014    | 0.26                                     | 0.31    | 0.57 |
| <b>Epinano</b>       | 0.58      | 0.25                                     | 0.27    | 0.52 |
| <b>Tombo_com</b>     | 0.50      | 0.24                                     | 0.24    | 0.49 |
| <b>Nanocompore</b>   | 0.9956    | 0.21                                     | 0.23    | 0.44 |
| <b>Xpore</b>         | -4.33     | 0.30                                     | 0.31    | 0.62 |
| <b>DiffErr</b>       | 0.95      | 0.27                                     | 0.32    | 0.59 |
| <b>DRUMMER</b>       | 0.061     | 0.28                                     | 0.32    | 0.60 |
| <b>ELIGOS_diff</b>   | 0.0057    | 0.28                                     | 0.31    | 0.59 |
| <b>Epinano_delta</b> | 0.97      | 0.29                                     | 0.29    | 0.57 |

**Supplementary Table 6** Recall and precision for all tools for 12 motifs bearing the consensus sequence RRACH. m6A profiles created from miCLIP and miCLIP2 results were used for validation separately.

**Recall (miCLIP)**

| Motif                | AAACA | AAACC | AAACT | AGACA | AGACC | AGACT | GAACA | GAACC | GAACT | GGACA | GGACC | GGACT |
|----------------------|-------|-------|-------|-------|-------|-------|-------|-------|-------|-------|-------|-------|
| <b>Tombo</b>         | 0.03  | 0.06  | 0.03  | 0.42  | 0.12  | 0.56  | 0.07  | 0.03  | 0.04  | 0.47  | 0.14  | 0.73  |
| <b>MINES</b>         | -     | -     | -     | -     | -     | 0.54  | -     | -     | -     | 0.42  | 0.31  | 0.71  |
| <b>Nanom6A</b>       | 0.11  | 0.06  | 0.12  | 0.11  | 0.11  | 0.52  | 0.04  | 0.07  | 0.17  | 0.36  | 0.28  | 0.76  |
| <b>m6Anet</b>        | 0.00  | 0.00  | 0.24  | 0.18  | 0.01  | 0.58  | 0.02  | 0.02  | 0.67  | 0.63  | 0.50  | 0.89  |
| <b>ELIGOS</b>        | 0.08  | 0.04  | 0.16  | 0.21  | 0.10  | 0.43  | 0.11  | 0.09  | 0.20  | 0.48  | 0.39  | 0.57  |
| <b>Epinano</b>       | 0.06  | 0.07  | 0.16  | 0.18  | 0.08  | 0.33  | 0.11  | 0.16  | 0.18  | 0.49  | 0.49  | 0.65  |
| <b>Tombo_com</b>     | 0.03  | 0.02  | 0.06  | 0.36  | 0.15  | 0.60  | 0.10  | 0.06  | 0.16  | 0.44  | 0.31  | 0.64  |
| <b>Nanocompore</b>   | 0.00  | 0.00  | 0.05  | 0.14  | 0.08  | 0.31  | 0.03  | 0.00  | 0.04  | 0.15  | 0.15  | 0.26  |
| <b>Xpore</b>         | 0.00  | 0.00  | 0.09  | 0.16  | 0.02  | 0.40  | 0.00  | 0.00  | 0.00  | 0.30  | 0.22  | 0.58  |
| <b>DiffErr</b>       | 0.02  | 0.02  | 0.06  | 0.17  | 0.10  | 0.29  | 0.03  | 0.09  | 0.03  | 0.50  | 0.48  | 0.51  |
| <b>DRUMMER</b>       | 0.02  | 0.03  | 0.05  | 0.20  | 0.12  | 0.32  | 0.04  | 0.08  | 0.06  | 0.50  | 0.46  | 0.51  |
| <b>ELIGOS_diff</b>   | 0.07  | 0.02  | 0.13  | 0.21  | 0.12  | 0.35  | 0.10  | 0.10  | 0.15  | 0.44  | 0.42  | 0.50  |
| <b>Epinano_delta</b> | 0.06  | 0.06  | 0.16  | 0.18  | 0.09  | 0.39  | 0.20  | 0.17  | 0.37  | 0.55  | 0.42  | 0.61  |

**Recall (miCLIP2)**

| Motif                | AAACA | AAACC | AAACT | AGACA | AGACC | AGACT | GAACA | GAACC | GAACT | GGACA | GGACC | GGACT |
|----------------------|-------|-------|-------|-------|-------|-------|-------|-------|-------|-------|-------|-------|
| <b>Tombo</b>         | 0.05  | 0.14  | 0.03  | 0.54  | 0.24  | 0.51  | 0.10  | 0.11  | 0.03  | 0.44  | 0.13  | 0.60  |
| <b>MINES</b>         | -     | -     | -     | -     | -     | 0.48  | -     | -     | -     | 0.34  | 0.23  | 0.57  |
| <b>Nanom6A</b>       | 0.14  | 0.04  | 0.10  | 0.17  | 0.17  | 0.45  | 0.04  | 0.10  | 0.15  | 0.28  | 0.24  | 0.60  |
| <b>m6Anet</b>        | 0.00  | 0.00  | 0.25  | 0.30  | 0.02  | 0.46  | 0.01  | 0.06  | 0.50  | 0.53  | 0.41  | 0.70  |
| <b>ELIGOS</b>        | 0.16  | 0.20  | 0.20  | 0.36  | 0.28  | 0.45  | 0.19  | 0.18  | 0.19  | 0.48  | 0.42  | 0.53  |
| <b>Epinano</b>       | 0.09  | 0.23  | 0.17  | 0.29  | 0.22  | 0.31  | 0.17  | 0.32  | 0.19  | 0.46  | 0.48  | 0.56  |
| <b>Tombo_com</b>     | 0.08  | 0.14  | 0.05  | 0.49  | 0.31  | 0.53  | 0.14  | 0.14  | 0.12  | 0.40  | 0.28  | 0.54  |
| <b>Nanocompore</b>   | 0.01  | 0.04  | 0.07  | 0.23  | 0.17  | 0.29  | 0.03  | 0.01  | 0.04  | 0.15  | 0.17  | 0.23  |
| <b>Xpore</b>         | 0.00  | 0.04  | 0.11  | 0.22  | 0.09  | 0.35  | 0.00  | 0.00  | 0.00  | 0.26  | 0.19  | 0.45  |
| <b>DiffErr</b>       | 0.04  | 0.15  | 0.08  | 0.29  | 0.26  | 0.31  | 0.07  | 0.15  | 0.03  | 0.47  | 0.50  | 0.47  |
| <b>DRUMMER</b>       | 0.08  | 0.19  | 0.05  | 0.32  | 0.27  | 0.33  | 0.07  | 0.17  | 0.06  | 0.47  | 0.48  | 0.46  |
| <b>ELIGOS_diff</b>   | 0.10  | 0.11  | 0.16  | 0.34  | 0.27  | 0.35  | 0.14  | 0.19  | 0.14  | 0.41  | 0.42  | 0.44  |
| <b>Epinano_delta</b> | 0.10  | 0.15  | 0.15  | 0.29  | 0.23  | 0.32  | 0.24  | 0.24  | 0.30  | 0.48  | 0.38  | 0.49  |



**Precision (miCLIP)**

| Motif                | AAACA | AAACC | AAACT | AGACA | AGACC | AGACT | GAACA | GAACC | GAACT | GGACA | GGACC | GGACT |
|----------------------|-------|-------|-------|-------|-------|-------|-------|-------|-------|-------|-------|-------|
| <b>Tombo</b>         | 0.02  | 0.02  | 0.04  | 0.05  | 0.03  | 0.28  | 0.05  | 0.01  | 0.17  | 0.13  | 0.10  | 0.30  |
| <b>MINES</b>         | -     | -     | -     | -     | -     | 0.28  | -     | -     | -     | 0.20  | 0.16  | 0.29  |
| <b>Nanom6A</b>       | 0.02  | 0.02  | 0.06  | 0.20  | 0.05  | 0.36  | 0.04  | 0.02  | 0.17  | 0.28  | 0.20  | 0.32  |
| <b>m6Anet</b>        | 0.00  | 0.00  | 0.48  | 0.40  | 0.33  | 0.53  | 0.20  | 0.14  | 0.31  | 0.47  | 0.38  | 0.44  |
| <b>ELIGOS</b>        | 0.03  | 0.02  | 0.11  | 0.15  | 0.06  | 0.33  | 0.07  | 0.04  | 0.25  | 0.28  | 0.18  | 0.34  |
| <b>Epinano</b>       | 0.02  | 0.02  | 0.08  | 0.14  | 0.06  | 0.30  | 0.07  | 0.03  | 0.18  | 0.29  | 0.14  | 0.31  |
| <b>Tombo_com</b>     | 0.01  | 0.01  | 0.10  | 0.07  | 0.04  | 0.28  | 0.05  | 0.04  | 0.27  | 0.15  | 0.13  | 0.27  |
| <b>Nanocompore</b>   | 0.01  | 0.02  | 0.18  | 0.29  | 0.19  | 0.40  | 0.11  | 0.00  | 0.29  | 0.35  | 0.25  | 0.39  |
| <b>Xpore</b>         | 0.01  | 0.00  | 0.20  | 0.42  | 0.18  | 0.47  | 0.00  | 0.00  | 0.16  | 0.40  | 0.31  | 0.44  |
| <b>DiffErr</b>       | 0.03  | 0.02  | 0.13  | 0.21  | 0.11  | 0.38  | 0.05  | 0.07  | 0.17  | 0.32  | 0.21  | 0.37  |
| <b>DRUMMER</b>       | 0.03  | 0.04  | 0.14  | 0.22  | 0.10  | 0.38  | 0.08  | 0.06  | 0.26  | 0.31  | 0.21  | 0.38  |
| <b>ELIGOS_diff</b>   | 0.05  | 0.02  | 0.17  | 0.19  | 0.11  | 0.37  | 0.09  | 0.06  | 0.30  | 0.31  | 0.23  | 0.37  |
| <b>Epinano_delta</b> | 0.04  | 0.02  | 0.14  | 0.16  | 0.07  | 0.37  | 0.09  | 0.05  | 0.27  | 0.28  | 0.19  | 0.36  |

**Precision (miCLIP2)**

| Motif                | AAACA | AAACC | AAACT | AGACA | AGACC | AGACT | GAACA | GAACC | GAACT | GGACA | GGACC | GGACT |
|----------------------|-------|-------|-------|-------|-------|-------|-------|-------|-------|-------|-------|-------|
| <b>Tombo</b>         | 0.00  | 0.00  | 0.04  | 0.03  | 0.03  | 0.30  | 0.04  | 0.03  | 0.20  | 0.11  | 0.13  | 0.36  |
| <b>MINES</b>         | -     | -     | -     | -     | -     | 0.30  | -     | -     | -     | 0.16  | 0.15  | 0.34  |
| <b>Nanom6A</b>       | 0.00  | 0.00  | 0.05  | 0.13  | 0.04  | 0.36  | 0.02  | 0.02  | 0.19  | 0.20  | 0.22  | 0.37  |
| <b>m6Anet</b>        | 0.00  | 0.00  | 0.54  | 0.31  | 0.33  | 0.57  | 0.07  | 0.29  | 0.33  | 0.40  | 0.44  | 0.55  |
| <b>ELIGOS</b>        | 0.01  | 0.01  | 0.12  | 0.11  | 0.08  | 0.40  | 0.07  | 0.06  | 0.32  | 0.26  | 0.26  | 0.46  |
| <b>Epinano</b>       | 0.00  | 0.01  | 0.07  | 0.10  | 0.07  | 0.33  | 0.06  | 0.04  | 0.25  | 0.25  | 0.19  | 0.39  |
| <b>Tombo_com</b>     | 0.00  | 0.01  | 0.07  | 0.04  | 0.04  | 0.29  | 0.04  | 0.05  | 0.26  | 0.12  | 0.15  | 0.32  |
| <b>Nanocompore</b>   | 0.01  | 0.02  | 0.21  | 0.21  | 0.18  | 0.45  | 0.07  | 0.02  | 0.33  | 0.32  | 0.35  | 0.50  |
| <b>Xpore</b>         | 0.00  | 0.01  | 0.22  | 0.24  | 0.34  | 0.48  | 0.04  | 0.03  | 0.19  | 0.33  | 0.34  | 0.50  |
| <b>DiffErr</b>       | 0.01  | 0.01  | 0.15  | 0.16  | 0.13  | 0.48  | 0.07  | 0.08  | 0.24  | 0.27  | 0.28  | 0.50  |
| <b>DRUMMER</b>       | 0.02  | 0.02  | 0.14  | 0.15  | 0.10  | 0.47  | 0.07  | 0.08  | 0.31  | 0.27  | 0.29  | 0.49  |
| <b>ELIGOS_diff</b>   | 0.01  | 0.01  | 0.19  | 0.13  | 0.12  | 0.43  | 0.07  | 0.08  | 0.36  | 0.27  | 0.29  | 0.48  |
| <b>Epinano_delta</b> | 0.01  | 0.00  | 0.12  | 0.11  | 0.08  | 0.37  | 0.06  | 0.04  | 0.29  | 0.22  | 0.22  | 0.41  |

**Supplementary Table 7** Recall and precision for all tools for m6A sites versus coverage. m6A profiles created from miCLIP and miCLIP2 results were used for validation separately.

**Recall (miCLIP)**

| <b>Coverage</b>      | <b>5-10</b> | <b>10-20</b> | <b>20-40</b> | <b>40-60</b> | <b>60-80</b> | <b>80-100</b> | <b>&gt;=100</b> |
|----------------------|-------------|--------------|--------------|--------------|--------------|---------------|-----------------|
| <b>Tombo</b>         | 0.23        | 0.34         | 0.39         | 0.42         | 0.40         | 0.40          | 0.41            |
| <b>MINES</b>         | 0.28        | 0.30         | 0.30         | 0.30         | 0.27         | 0.30          | 0.27            |
| <b>Nanom6A</b>       | 0.41        | 0.37         | 0.33         | 0.31         | 0.28         | 0.28          | 0.24            |
| <b>m6Anet</b>        | -           | -            | 0.44         | 0.38         | 0.33         | 0.32          | 0.30            |
| <b>ELIGOS</b>        | 0.08        | 0.26         | 0.41         | 0.49         | 0.55         | 0.60          | 0.63            |
| <b>Epinano</b>       | 0.37        | 0.34         | 0.34         | 0.31         | 0.32         | 0.28          | 0.28            |
| <b>Tombo_com</b>     | 0.44        | 0.41         | 0.34         | 0.27         | 0.24         | 0.20          | 0.14            |
| <b>Nanocompore</b>   | 0.04        | 0.07         | 0.14         | 0.23         | 0.26         | 0.31          | 0.43            |
| <b>Xpore</b>         | 0.15        | 0.22         | 0.27         | 0.29         | 0.32         | 0.29          | 0.32            |
| <b>DiffErr</b>       | 0.09        | 0.18         | 0.30         | 0.38         | 0.43         | 0.52          | 0.53            |
| <b>DRUMMER</b>       | 0.08        | 0.18         | 0.32         | 0.39         | 0.46         | 0.55          | 0.56            |
| <b>ELIGOS_diff</b>   | 0.07        | 0.20         | 0.33         | 0.43         | 0.48         | 0.58          | 0.61            |
| <b>Epinano_delta</b> | 0.44        | 0.41         | 0.37         | 0.31         | 0.30         | 0.27          | 0.27            |

**Recall (miCLIP2)**

| <b>Coverage</b>      | <b>5-10</b> | <b>10-20</b> | <b>20-40</b> | <b>40-60</b> | <b>60-80</b> | <b>80-100</b> | <b>&gt;=100</b> |
|----------------------|-------------|--------------|--------------|--------------|--------------|---------------|-----------------|
| <b>Tombo</b>         | 0.24        | 0.35         | 0.41         | 0.42         | 0.42         | 0.41          | 0.36            |
| <b>MINES</b>         | 0.33        | 0.32         | 0.31         | 0.29         | 0.29         | 0.27          | 0.22            |
| <b>Nanom6A</b>       | 0.45        | 0.39         | 0.34         | 0.29         | 0.29         | 0.25          | 0.18            |
| <b>m6Anet</b>        | 0.00        | 0.00         | 0.47         | 0.40         | 0.35         | 0.35          | 0.26            |
| <b>ELIGOS</b>        | 0.10        | 0.32         | 0.46         | 0.54         | 0.59         | 0.59          | 0.61            |
| <b>Epinano</b>       | 0.45        | 0.42         | 0.37         | 0.34         | 0.35         | 0.27          | 0.24            |
| <b>Tombo_com</b>     | 0.50        | 0.44         | 0.35         | 0.28         | 0.26         | 0.18          | 0.10            |
| <b>Nanocompore</b>   | 0.04        | 0.08         | 0.15         | 0.21         | 0.27         | 0.29          | 0.43            |
| <b>Xpore</b>         | 0.18        | 0.23         | 0.28         | 0.27         | 0.32         | 0.27          | 0.26            |
| <b>DiffErr</b>       | 0.11        | 0.22         | 0.33         | 0.43         | 0.46         | 0.47          | 0.55            |
| <b>DRUMMER</b>       | 0.09        | 0.21         | 0.34         | 0.42         | 0.48         | 0.47          | 0.57            |
| <b>ELIGOS_diff</b>   | 0.08        | 0.23         | 0.35         | 0.44         | 0.51         | 0.54          | 0.58            |
| <b>Epinano_delta</b> | 0.48        | 0.44         | 0.37         | 0.30         | 0.32         | 0.25          | 0.19            |

**Precision (miCLIP)**

| <b>Coverage</b>      | <b>5-10</b> | <b>10-20</b> | <b>20-40</b> | <b>40-60</b> | <b>60-80</b> | <b>80-100</b> | <b>&gt;=100</b> |
|----------------------|-------------|--------------|--------------|--------------|--------------|---------------|-----------------|
| <b>Tombo</b>         | 0.14        | 0.14         | 0.16         | 0.15         | 0.15         | 0.13          | 0.10            |
| <b>MINES</b>         | 0.18        | 0.24         | 0.32         | 0.36         | 0.33         | 0.34          | 0.29            |
| <b>Nanom6A</b>       | 0.13        | 0.19         | 0.26         | 0.29         | 0.29         | 0.29          | 0.22            |
| <b>m6Anet</b>        | -           | -            | 0.40         | 0.45         | 0.44         | 0.43          | 0.42            |
| <b>ELIGOS</b>        | 0.16        | 0.23         | 0.27         | 0.25         | 0.25         | 0.23          | 0.13            |
| <b>Epinano</b>       | 0.11        | 0.19         | 0.27         | 0.29         | 0.35         | 0.30          | 0.26            |
| <b>Tombo_com</b>     | 0.10        | 0.15         | 0.26         | 0.38         | 0.49         | 0.51          | 0.53            |
| <b>Nanocompore</b>   | 0.37        | 0.39         | 0.43         | 0.42         | 0.38         | 0.37          | 0.20            |
| <b>Xpore</b>         | 0.28        | 0.37         | 0.46         | 0.48         | 0.47         | 0.45          | 0.38            |
| <b>DiffErr</b>       | 0.26        | 0.31         | 0.35         | 0.33         | 0.31         | 0.31          | 0.14            |
| <b>DRUMMER</b>       | 0.26        | 0.32         | 0.37         | 0.33         | 0.34         | 0.33          | 0.14            |
| <b>ELIGOS_diff</b>   | 0.21        | 0.28         | 0.34         | 0.32         | 0.32         | 0.32          | 0.15            |
| <b>Epinano_delta</b> | 0.12        | 0.21         | 0.37         | 0.49         | 0.56         | 0.58          | 0.59            |

**Precision (miCLIP2)**

| <b>Coverage</b>      | <b>5-10</b> | <b>10-20</b> | <b>20-40</b> | <b>40-60</b> | <b>60-80</b> | <b>80-100</b> | <b>&gt;=100</b> |
|----------------------|-------------|--------------|--------------|--------------|--------------|---------------|-----------------|
| <b>Tombo</b>         | 0.12        | 0.14         | 0.17         | 0.16         | 0.16         | 0.16          | 0.13            |
| <b>MINES</b>         | 0.18        | 0.25         | 0.34         | 0.37         | 0.39         | 0.36          | 0.34            |
| <b>Nanom6A</b>       | 0.12        | 0.19         | 0.26         | 0.28         | 0.32         | 0.30          | 0.24            |
| <b>m6Anet</b>        | -           | -            | 0.42         | 0.49         | 0.50         | 0.54          | 0.50            |
| <b>ELIGOS</b>        | 0.17        | 0.26         | 0.30         | 0.29         | 0.28         | 0.26          | 0.18            |
| <b>Epinano</b>       | 0.11        | 0.21         | 0.29         | 0.33         | 0.40         | 0.35          | 0.30            |
| <b>Tombo_com</b>     | 0.09        | 0.16         | 0.28         | 0.42         | 0.56         | 0.57          | 0.57            |
| <b>Nanocompore</b>   | 0.34        | 0.41         | 0.45         | 0.41         | 0.41         | 0.41          | 0.28            |
| <b>Xpore</b>         | 0.27        | 0.38         | 0.47         | 0.47         | 0.49         | 0.49          | 0.44            |
| <b>DiffErr</b>       | 0.25        | 0.35         | 0.39         | 0.38         | 0.35         | 0.33          | 0.21            |
| <b>DRUMMER</b>       | 0.25        | 0.35         | 0.39         | 0.37         | 0.37         | 0.34          | 0.21            |
| <b>ELIGOS_diff</b>   | 0.18        | 0.30         | 0.35         | 0.35         | 0.36         | 0.35          | 0.20            |
| <b>Epinano_delta</b> | 0.11        | 0.21         | 0.37         | 0.50         | 0.63         | 0.62          | 0.60            |

**Supplementary Table 8** Recall for all tools for m6A sites versus versus methylation rate/site enrichment. m6A profiles created from m6A-REF-seq, miCLIP and miCLIP2 results were used for validation separately.

**m6A-REF-seq**

| <b>Methylation rate</b> | <b>0-0.2</b> | <b>0.2-0.4</b> | <b>0.4-0.6</b> | <b>0.6-0.8</b> | <b>0.8-1</b> |
|-------------------------|--------------|----------------|----------------|----------------|--------------|
| <b>Tombo</b>            | 0.16         | 0.24           | 0.28           | 0.30           | 0.41         |
| <b>MINES</b>            | 0.04         | 0.11           | 0.18           | 0.26           | 0.38         |
| <b>Nanom6A</b>          | 0.07         | 0.17           | 0.27           | 0.36           | 0.57         |
| <b>m6Anet</b>           | 0.05         | 0.11           | 0.17           | 0.31           | 0.34         |
| <b>ELIGOS</b>           | 0.22         | 0.34           | 0.38           | 0.54           | 0.66         |
| <b>Epinano</b>          | 0.09         | 0.23           | 0.34           | 0.50           | 0.65         |
| <b>Tombo_com</b>        | 0.07         | 0.25           | 0.31           | 0.34           | 0.44         |
| <b>Nanocompore</b>      | 0.11         | 0.13           | 0.16           | 0.23           | 0.22         |
| <b>Xpore</b>            | 0.08         | 0.15           | 0.19           | 0.29           | 0.46         |
| <b>DiffErr</b>          | 0.22         | 0.30           | 0.39           | 0.54           | 0.67         |
| <b>DRUMMER</b>          | 0.24         | 0.31           | 0.41           | 0.52           | 0.65         |
| <b>ELIGOS_diff</b>      | 0.22         | 0.30           | 0.38           | 0.49           | 0.65         |
| <b>Epinano_delta</b>    | 0.11         | 0.28           | 0.34           | 0.54           | 0.71         |

**miCLIP**

| <b>Site enrichment</b> | <b>0-1</b> | <b>1-2</b> | <b>2-3</b> | <b>3-4</b> | <b>4-5</b> | <b>5-6</b> | <b>&gt;6</b> |
|------------------------|------------|------------|------------|------------|------------|------------|--------------|
| <b>Tombo</b>           | 0.31       | 0.32       | 0.31       | 0.32       | 0.36       | 0.35       | 0.36         |
| <b>MINES</b>           | 0.25       | 0.24       | 0.26       | 0.27       | 0.30       | 0.31       | 0.32         |
| <b>Nanom6A</b>         | 0.25       | 0.29       | 0.30       | 0.32       | 0.36       | 0.36       | 0.40         |
| <b>m6Anet</b>          | 0.24       | 0.21       | 0.20       | 0.18       | 0.19       | 0.20       | 0.18         |
| <b>ELIGOS</b>          | 0.34       | 0.33       | 0.31       | 0.32       | 0.32       | 0.35       | 0.34         |
| <b>Epinano</b>         | 0.24       | 0.25       | 0.28       | 0.30       | 0.32       | 0.34       | 0.40         |
| <b>Tombo_com</b>       | 0.24       | 0.28       | 0.29       | 0.33       | 0.36       | 0.37       | 0.41         |
| <b>Nanocompore</b>     | 0.19       | 0.16       | 0.14       | 0.13       | 0.15       | 0.15       | 0.15         |
| <b>Xpore</b>           | 0.17       | 0.20       | 0.21       | 0.22       | 0.23       | 0.25       | 0.28         |
| <b>DiffErr</b>         | 0.28       | 0.26       | 0.26       | 0.27       | 0.27       | 0.29       | 0.27         |
| <b>DRUMMER</b>         | 0.28       | 0.27       | 0.27       | 0.28       | 0.27       | 0.29       | 0.28         |
| <b>ELIGOS_diff</b>     | 0.30       | 0.29       | 0.28       | 0.29       | 0.31       | 0.30       | 0.30         |
| <b>Epinano_delta</b>   | 0.24       | 0.28       | 0.31       | 0.33       | 0.37       | 0.41       | 0.44         |

**miCLIP2**

| <b>Site enrichment</b> | <b>0-1</b> | <b>1-2</b> | <b>2-3</b> | <b>3-4</b> | <b>4-5</b> | <b>5-6</b> | <b>&gt;6</b> |
|------------------------|------------|------------|------------|------------|------------|------------|--------------|
| <b>Tombo</b>           | 0.21       | 0.31       | 0.33       | 0.36       | 0.39       | 0.42       | 0.42         |
| <b>MINES</b>           | 0.11       | 0.22       | 0.28       | 0.32       | 0.36       | 0.40       | 0.38         |
| <b>Nanom6A</b>         | 0.09       | 0.22       | 0.29       | 0.34       | 0.41       | 0.43       | 0.48         |
| <b>m6Anet</b>          | 0.12       | 0.23       | 0.25       | 0.23       | 0.25       | 0.25       | 0.22         |
| <b>ELIGOS</b>          | 0.27       | 0.35       | 0.41       | 0.42       | 0.42       | 0.44       | 0.43         |
| <b>Epinano</b>         | 0.11       | 0.24       | 0.33       | 0.40       | 0.41       | 0.44       | 0.54         |
| <b>Tombo_com</b>       | 0.11       | 0.25       | 0.31       | 0.39       | 0.43       | 0.43       | 0.50         |
| <b>Nanocompore</b>     | 0.13       | 0.16       | 0.18       | 0.16       | 0.19       | 0.19       | 0.17         |
| <b>Xpore</b>           | 0.08       | 0.17       | 0.23       | 0.26       | 0.28       | 0.33       | 0.34         |
| <b>DiffErr</b>         | 0.21       | 0.29       | 0.31       | 0.33       | 0.33       | 0.37       | 0.36         |
| <b>DRUMMER</b>         | 0.22       | 0.30       | 0.32       | 0.34       | 0.33       | 0.37       | 0.35         |
| <b>ELIGOS_diff</b>     | 0.21       | 0.31       | 0.33       | 0.34       | 0.36       | 0.38       | 0.37         |
| <b>Epinano_delta</b>   | 0.09       | 0.22       | 0.32       | 0.39       | 0.42       | 0.47       | 0.55         |
